# Supplementary material
Source: PubMed Central journal article supplement (PMC3124366)
Supplement: NIHMS297810-supplement-Table_s1_Fig_s1.pdf [file NIHMS297810-supplement-Table_s1_Fig_s1.pdf]

**Table S1.**

| Primer name              | Sequence (5' to 3')                                                                                           | description                                                                     |
|--------------------------|---------------------------------------------------------------------------------------------------------------|---------------------------------------------------------------------------------|
| T7ter1                   | AGCTTTAGCATAACCCCTTGGGGCCTCTAAACGGGTCTTGAGG<br>GGTTTTTTGAT                                                    | T7 terminator                                                                   |
| T7ter2                   | CAAAAACCCCTCAAGACCCGTTTAGAGGCCCAAGGGGTTAT<br>GCTAA                                                            |                                                                                 |
| stops1                   | AATTGTAGCTAGCTAGG                                                                                             | stops in every<br>reading frame                                                 |
| stops2                   | AATTCCTAGCTAGCTAC                                                                                             |                                                                                 |
| ZifVG-sense              | GGCCGCCGGTACCAAGCTTCCTCGAGTCTATACAGATATTGAA<br>ATGAATAGATTAGGAAAACA                                           | Inserts VSV-G tag<br>and extra restriction<br>enzyme sites                      |
| ZifVG-AS                 | TCGATGTTTTCTAATCTATTCAATTCATATCTGTATAAAGCTT<br>GACTCGAGGGGTACCGGC                                             |                                                                                 |
| malE-5R                  | ATATAGAATTCTAAGGAGGCGCCCCATGAAAATCGAAGAAGG<br>TAAACTGG                                                        | amplify malE lacking<br>a signal sequence<br>and stop codon                     |
| malE-3K<br>pcrG5E        | ATATAGGTACCTGCGGCCGCTTGGTGATACGAGTCTGCGC<br>AAAAAGAATTTCGATTCCCTACCATGGGCGACATGAA                             | clone <i>pcrG</i> in<br>pPSV37                                                  |
| pcrG3H<br>pcrV2-5R       | AAAAAAAGCTTTTCCTCAGATCAACAAGCCACGCA<br>AAAAGAATTCTGGCTTGTTGATCTGAGGAATCACGA                                   | clone <i>pcrV</i> in<br>pPSV35 and pPSV37                                       |
| pcrV2-3H<br>pcrVd3-21-5R | AAAAAAAGCTTCGGCTGGTTCATGGATACCTCTA<br>GAATTCTGGCTTGTTGATCTGAGGAATCACGATGGAAGCGGC<br>GCCTGCCAGTGCCGAGCAGGAGGAA | clone <i>pcrV</i> ( $\Delta$ 3-21) in<br>pPSV35                                 |
| <i>pcrVS1-215R</i> (2)   | ATCGCTTCAGCAGAGTCCGTCTTTCGCCGTCTGAATTGCACCAG<br>GCCGCCAGTGCGGCCCTGCCAGTGCCGAGCAGGAGGAA                        | 1. round PCR to<br>create <i>exoS</i> (1-21)-<br><i>pcrV</i> (22-294) fusion    |
| <i>pcrVS1-21-5R</i> (1)  | AAAAAGAATTCTGGCTTGTTGATCTGAGGAATCACGATGCATAT<br>TCAATCGCTTCAGCAGAGTCCGTCTTTCGCCGT                             | 2. round PCR to<br>create <i>exoS</i> (1-21)-<br><i>pcrV</i> (22-294) fusion    |
| pGdel5-1                 | AAAAAGAATTCCGGGCTGCCGGTGCTGTCCTACCA                                                                           | 5' flanking primer to<br>delete/mutate <i>pcrG</i>                              |
| pcrG2-5-2                | AACTCGAGCCGCAAGCATGCTGAAGGTGTATTCGTTTCATGTCTG<br>CCCA                                                         | internal primer to<br>delete <i>pcrG</i> (5' flank)                             |
| pcrG2-3-1                | TTCAGCATGCTTGCGGCTCGAGTTCCGATGCGTGGCTTGTTGA<br>TCT                                                            | internal primer to<br>delete <i>pcrG</i> (3' flank)                             |
| pcrG2-3-2                | AAAAAAAGCTTCCGCGGTCAGCGCCTTGAGCTCGT                                                                           | 3' flanking primer to<br>delete/mutate <i>pcrG</i>                              |
| Gstn1-5-2                | AGGGTGTCTTCGGTGTATTCGTTTCATGTCGCCGATGGTAGGGA<br>TCGACGTTGCCGGAGCCTGT                                          | <i>pcrG</i> (ATG1)->ATC<br>(5' flank internal pr.)                              |
| Gst1n-3-1                | ACAGGCTCCGGCAACGTTCGATCCCTACCATCGGCGACATGAA<br>CGAATACACCGAAGACACCCT                                          | <i>pcrG</i> (ATG1)->ATC<br>(3' flank internal pr.)                              |
| Gst2-5-2                 | AGGGTGTCTTCGGTGTATTCGTTCCCGTCGCCCATGGTAGGG<br>ATCGACGTTGCCGGAGCCTGT                                           | <i>pcrG</i> (ATG2)->GGG<br>(5' flank internal pr.)                              |
| Gst2-3-1                 | ACAGGCTCCGGCAACGTTCGATCCCTACCATGGGCGACGGGAA<br>CGAATACACCGAAGACACCCT                                          | <i>pcrG</i> (ATG2)->GGG<br>(3' flank internal pr.)                              |
| Gins-5-2                 | TTTTCTAATCTATTCAATTCATATCTGTATACTCTCGCTCCGG<br>CGCCTGGAACAGC                                                  | replace aa (58-60) of<br>PcrG with a VSV-G<br>tag (internal 5' flank<br>primer) |
| Gins-3-1                 | TATACAGATATTGAAATGAATAGATTAGGAAAAGCCGCCGAAG                                                                   | replace aa (58-60) of                                                           |

|                                               |                                                                                                                                                    |                                                                                          |
|-----------------------------------------------|----------------------------------------------------------------------------------------------------------------------------------------------------|------------------------------------------------------------------------------------------|
|                                               | AGGAGCTGCT                                                                                                                                         | PcrG with a VSV-G tag (internal 3' flank primer)                                         |
| pcrGi3VG5-2                                   | CTATATCGGTGTATTTTCCTAATCTATTCATTTCAATATCTGTAT<br>ACTTCCCCAACCTGTTTCATCTCGATGTCCGTGTACTCTCGCTC<br>CGGCGCCTGGAA                                      | convert pcrG with 1 VSV-G tag inserted to one with 3 inserted (internal 5' flank primer) |
| pcrGi3VG3-1                                   | AACAGGTTGGGGAAGTATACAGATATTGAAATGAATAGATTAG<br>GAAAATACACCGATATAGAGATGAACAGACTAGGCAAAGCCGC<br>CGAAGAGGA                                            | convert pcrG with 1 VSV-G tag inserted to one with 3 inserted (internal 3' flank primer) |
| pcrV3-12                                      | TTCAGCATGCTTGCGGCTCGAGTTGTCGGCGATCCCAGGTGG<br>AAGGACA                                                                                              | internal 3' flank primer to make <i>pcrGV</i> deletion                                   |
| pcrV3-2                                       | AAAAAAGCTTCCAGGGCCCGGGCCGAGTAGAA                                                                                                                   | 3' flank primer to make <i>pcrGV</i> deletion                                            |
| pvrVL262Drev                                  | TAGCGGGAGCTGGTGTCTGTTGTCCAGGGTGGTCTTCTCGTT                                                                                                         | introduce L262D mutation (internal primer for 5' flank)                                  |
| pcrVL262Dfor                                  | AACGAGAAGACCACCCTGGACAACGACACCAGCTCCCGCTA                                                                                                          | introduce L262D mutation (internal primer for 3' flank)                                  |
| pcrVL262Dtest                                 | AACGAGAAGACCACCCTGGA                                                                                                                               | primer to test for presence of mutation                                                  |
| pcrVF297Rrev                                  | ACGCTGTCGTATTTCTGGATGCGGCCGGTTGAGCGCCTCGACC<br>GCCGA                                                                                               | introduce F279R mutation (internal primer for 5' flank)                                  |
| pcrVF297Rfor                                  | TCGGCGGTTCGAGGCGCTCAACCGCCGCATCCAGAAATACGAC<br>AGCGT                                                                                               | introduce F279R mutation (internal primer for 3' flank)                                  |
| pcrVF297Rtest                                 | TCGGCGGTTCGAGGCGCTCAACCGCCG                                                                                                                        | primer to test for presence of mutation                                                  |
| pcrGA16R-3-1                                  | TGCGGGCGACCGTCCAGGCCCGAGAACTGGCGATTTCGCGA                                                                                                          | introduce A16R mutation (internal primer for 3' flank)                                   |
| pcrGA16R-5-2                                  | TCGCGAATCGCCAGTTCTCGGGCCTGGACGGTCGCCCCGCA                                                                                                          | introduce A16R mutation (internal primer for 5' flank)                                   |
| pcrGA16Rtest                                  | TGCGGGCGACCGTCCAGGCCCGA                                                                                                                            | primer to test for presence of mutation                                                  |
| GfZif-3Xho                                    | AAAAACTCGAGGGGCGGCCGCGATCAACAAGCCACGCATCGG<br>CGT                                                                                                  | clone <i>pcrG</i> into pACTR-AP-Zif and pZiVG                                            |
| GZif2-5Nde<br>VOm-5H<br>VOm-3Not<br>pcrG5-Bam | AAAAACATATGAACGAATACACCGAAGACA<br>AAAAAAGCTTTGGCTTGTTGATCTGAGGAATCACGA<br>AAAAAGCGGCCGCGATCGCGCTGAGAATGTCGCGCAGGA<br>AAAAAGGATCCGAACGAATACACCGAAGA | clone <i>pcrV</i> into pBR $\omega$                                                      |
| pcrV5EX                                       | AAAAACATATGGAAGTCAGAAACCTTAATGCCGCT                                                                                                                | clone <i>pcrG</i> into pDuet-1, together with pcrG3H                                     |
| pcrV3K                                        | AAAAAGGTACCTCGGCTGGTTCATGGATACCTCTA                                                                                                                | clone <i>pcrV</i> into pDuet-1                                                           |

|          |                                      |                                                                  |
|----------|--------------------------------------|------------------------------------------------------------------|
| GM2-70-5 | AAAAAGGTACCAACGAATACACCGAAGACACCCT   | clone <i>pcrG</i> into pMal,<br>together with pcrG3H             |
| GM2-40-3 | AAAAAAAGCTTTCAGGCAAGCCCCAGGCCTTGCCAC | clone <i>pcrG</i> (2-40) into<br>pMal, together with<br>GM2-70-5 |
| GM41-5   | AAAAAGGTACCGCGGACGCCGGCGAGCTGCTG     | clone <i>pcrG</i> (41-95)<br>into pMal, together<br>with pcrG3H  |

---



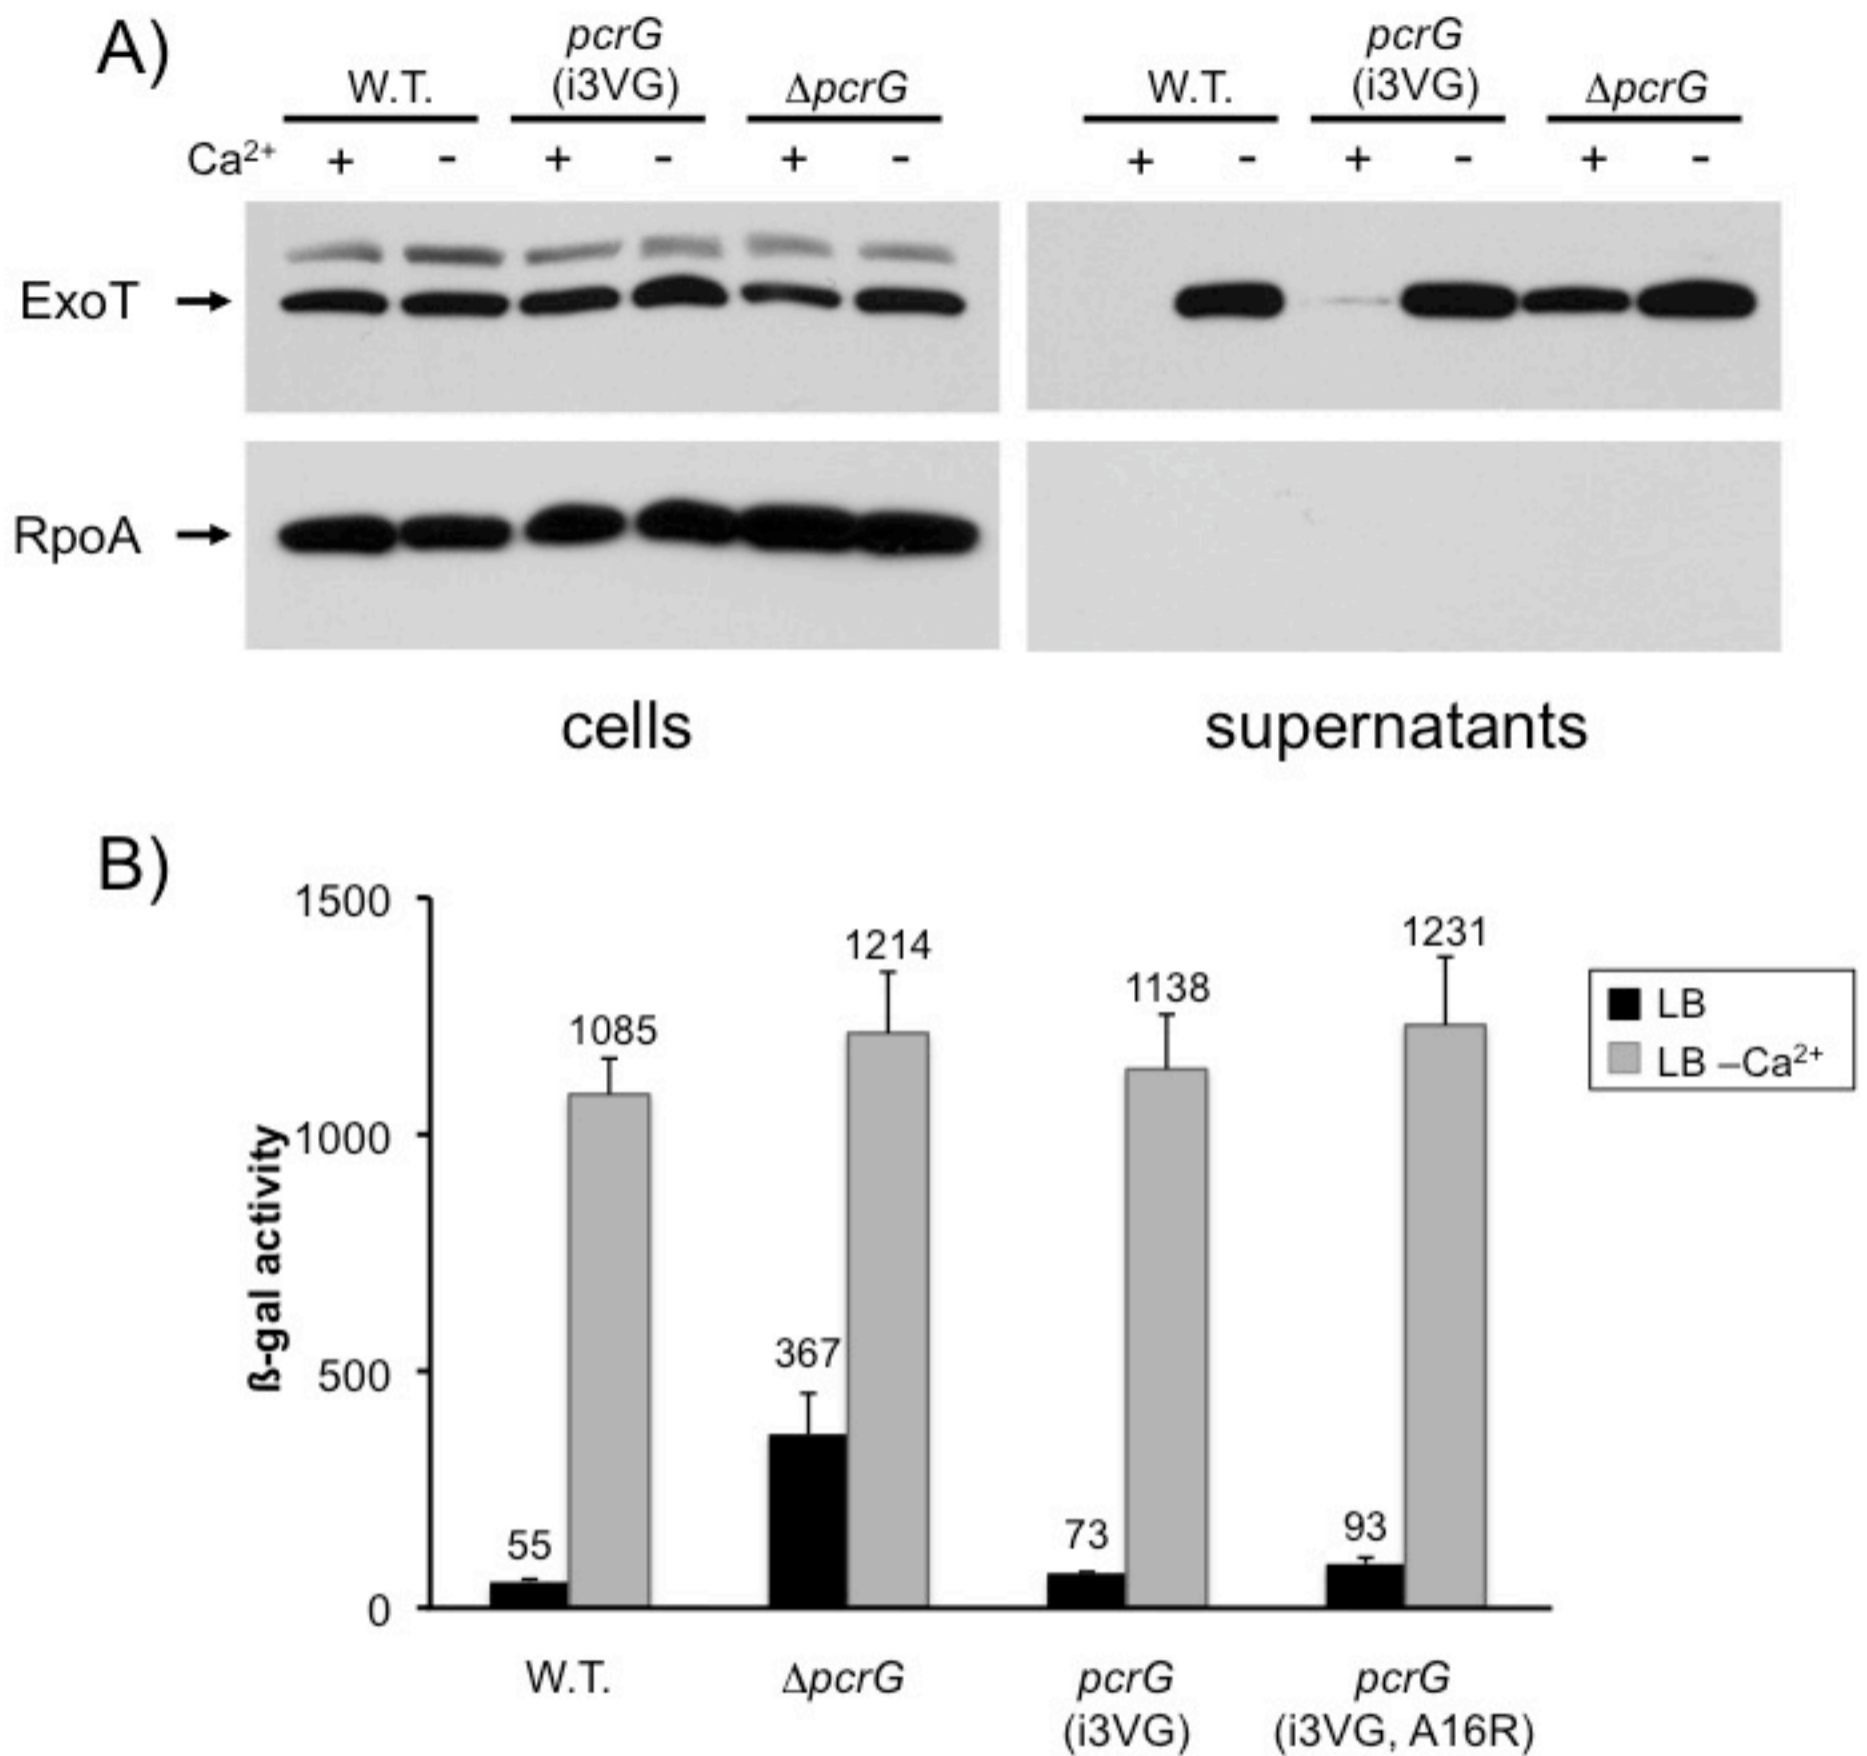

**Fig. S2. Internally tagged PcrG(i3VG).** The ability of an internally tagged version of PcrG (PcrG(i3VG)) to control effector secretion was assayed both by RECC assay (A), as well as  $\beta$ -galactosidase assay using a *lacZ* reporter inserted into the *exoS* locus (B). Cell and supernatant fractions, as well as the detected protein are indicated.

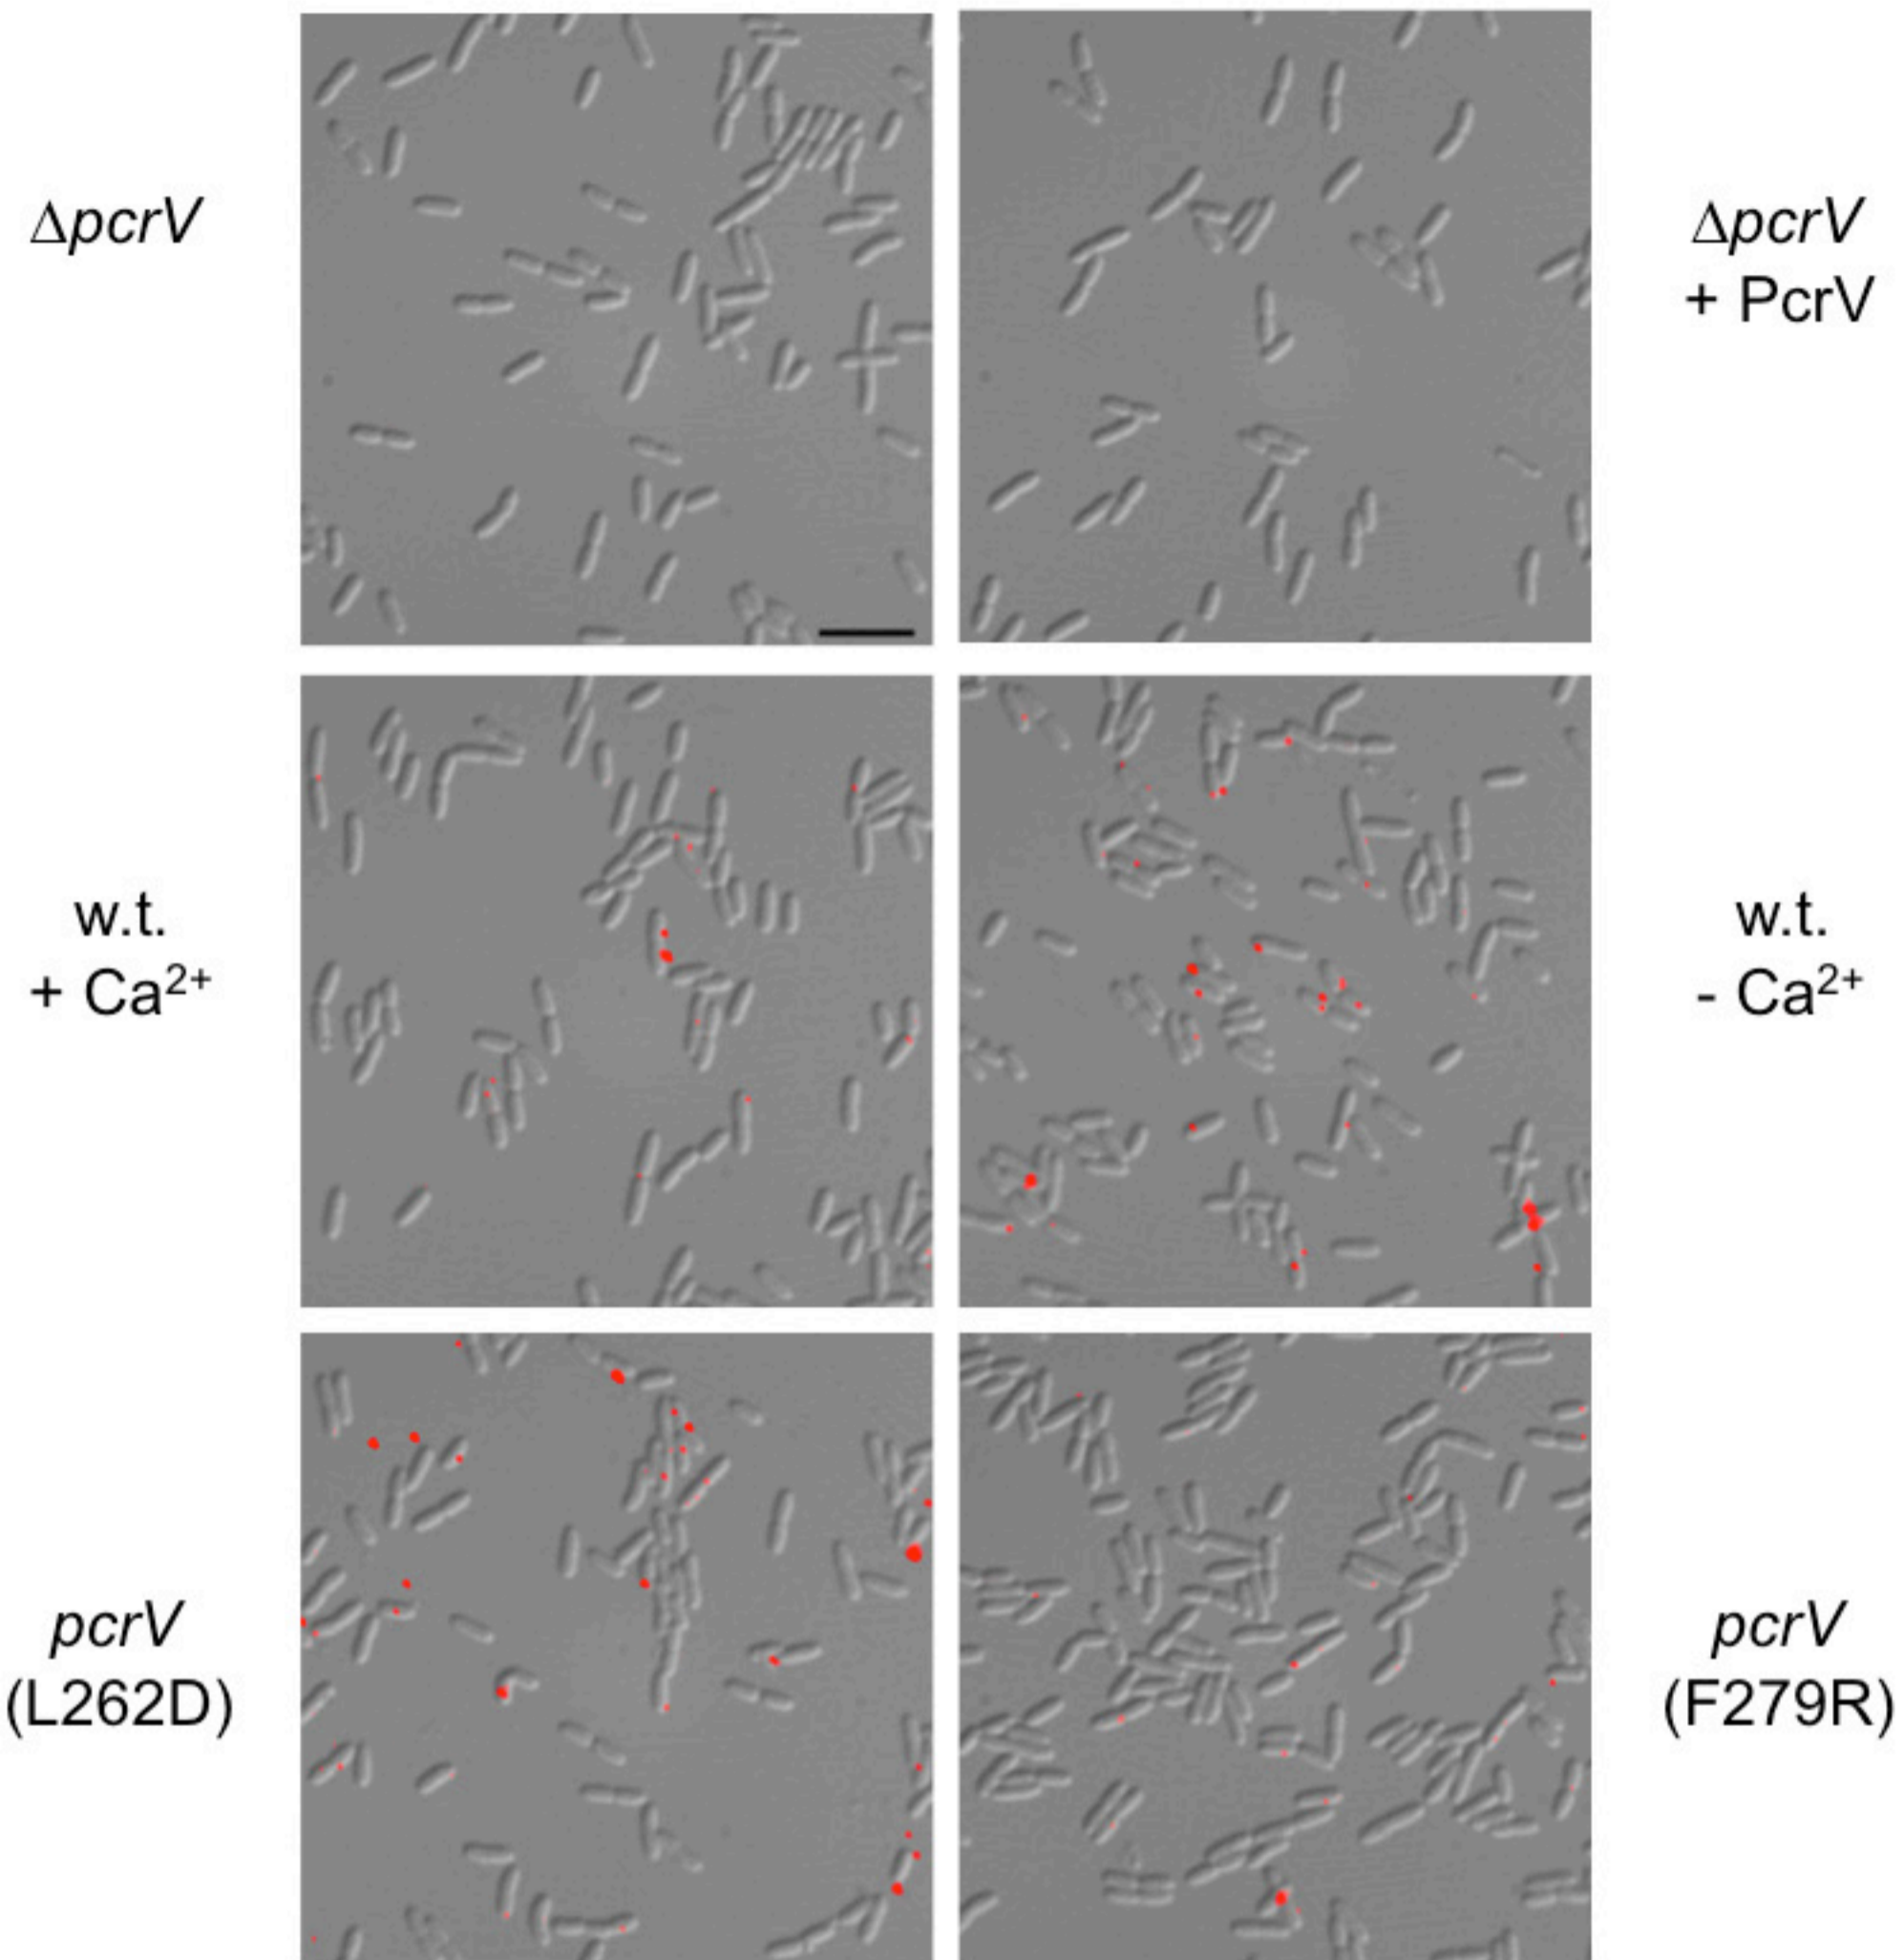

**Fig. S3 PcrV surface localization.** Bacteria were stained as described under the FACS analysis heading of the Experimental Design section. The bacteria were imaged by DIC microscopy and fluorescence microscopy and the images were overlaid using Adobe Photoshop. All exposure times were equal and any changes in levels of the fluorescent image were applied equally to all images. The scale bar is 5 $\mu$ m in length. The relevant strain genotype (and presence of calcium, where applicable) is listed next to each panel.
